# Supplementary material for: Foliar Diseases and the Associated Fungi in Rice Cultivated in Kenya
Source: MDPI journal article supplement (doi:10.3390/plants11091264), 2022-05-07
Supplement: s1 [file s1]

**Supplementary Table S1.** Correlation between foliar disease components and agronomic traits of rice based on a survey conducted in Busia and Kisumu Counties of Kenya in 2019

|                                              | <b>Blast severity</b> | <b>Blast incidence</b> | <b>Brown spot incidence</b> | <b>Blast infection rate</b> | <b>Age of the crop</b> | <b>Plant height (cm)</b> |
|----------------------------------------------|-----------------------|------------------------|-----------------------------|-----------------------------|------------------------|--------------------------|
| <b>Blast incidence</b>                       | 0.9566 (<0.0001)      |                        |                             |                             |                        |                          |
| <b>Brown spot incidence</b>                  | 0.3437(0.0109)        | 0.342 (0.0122)         |                             |                             |                        |                          |
| <b>Blast infection rate<sup>1</sup></b>      | 0.1302(0.7027)        | 0.4989(0.1183)         | -                           |                             |                        |                          |
|                                              |                       |                        | 0.7189(0.1430)              |                             |                        |                          |
| <b>Brown spot infection rate<sup>2</sup></b> | 0.1471(0.9764)        | -0.0506(0.4077)        | -0.0461(0.893)              | -0.3488(0.2931)             |                        |                          |
| <b>Age of the crop</b>                       | 0.1506(0.3349)        | 0.246(0.1163)          | 0.2203(0.1506)              | .                           |                        |                          |
| <b>Plant height (cm)</b>                     | 0.203(0.1619)         | 0.2628(0.0711)         | 0.3494(0.012)               | .                           | 0.609(<0.0001)         |                          |
| <b>lodging (0-3)</b>                         | 0.1576(0.2794)        | 0.2194(0.1341)         | 0.2611(0.0671)              | .                           | 0.4394(0.0032)         | 0.4929(<0.0001)          |

<sup>1</sup>Brown spot and <sup>2</sup>blast infection rates are based on proportion of samples with detectable *Cochliobolus miyabeanus* or *M. oryzae* using PCR. Within each cell: Spearman's rho correlation coefficient outside the bracket and the *p*-value within the bracket.

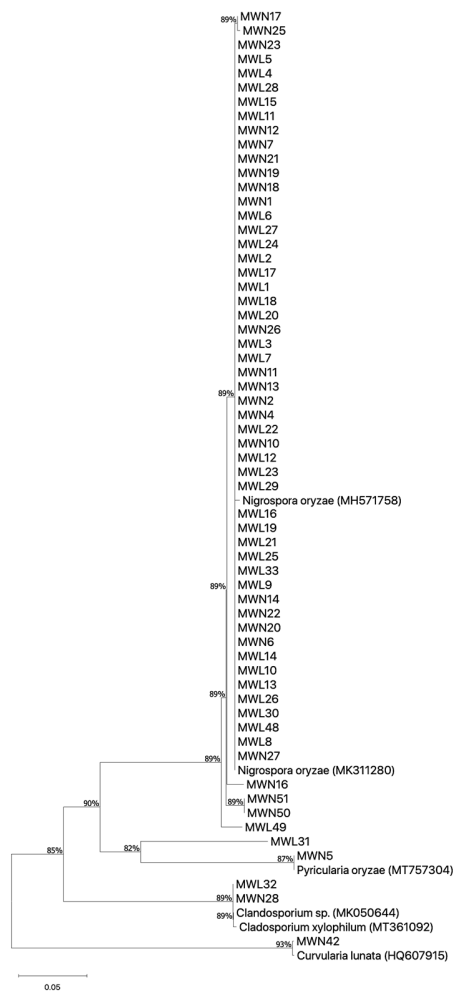

**Supplementary Figure S1.** Genetic relationship for isolates of *Nigrospora oryzae* from Kirinyaga, Kenya. Isolates of *Pycularia oryzae* (*Magnaporthe oryzae*) (MWN5 and MT757304), *Cladosporium* sp (MWL32, MWN28, MK050644 and MT361092), and *Curvularia lunata* (MWN2 and HQ607915) were included as outgroups. The Neighbor-joining tree was generated using nucleotides of the internally transcribed spacer (ITS) of the ribosomal RNA.
